# Supplementary material for: Histone lactylation couples cellular metabolism with developmental gene regulatory networks
Source: PubMed Central journal article supplement (PMC10762033; doi:10.1038/s41467-023-44121-1), 2024-01-02
Supplement: 41467_2023_44121_MOESM3_ESM.pdf [file 41467_2023_44121_MOESM3_ESM.pdf]

## Description of Additional Supplementary Files

File Name: Supplementary Data 1

Description: Table of flow cytometry data containing PanK1a and TFAP2B levels for cells from HH9 embryonic heads.

File Name: Supplementary Data 2

Description: Table of flow cytometry data containing PanK1a levels for TFAP2B-positive cells from HH9 and HH12+ embryonic heads as well as for Pax7-positive cells from HH6 whole embryos.

File Name: Supplementary Data 3

Description: Table of consensus PanK1a CUT&RUN peakset from HH9 NCCs with closest gene assignment information.

File Name: Supplementary Data 4

Description: Table of GO terms enriched among genes associated with the most highly lactylated peaks from the PanK1a CUT&RUN dataset.

File Name: Supplementary Data 5

Description: Table listing the NCC enhancer elements compiled from the literature.

File Name: Supplementary Data 6

Description: Table of consensus H3K18La CUT&RUN peakset from HH9 NCCs with closest gene assignment information.

File Name: Supplementary Data 7

Description: Ranked list of motifs enriched the neural crest scATAC-seq peakset.

File Name: Supplementary Data 8

Description: Table of differential accessibility results for DMSO vs (R)-GNE-140 ATAC-seq samples.

File Name: Supplementary Data 9

Description: Table of differential analysis results for NCC vs PSM PanK1a CUT&RUN samples.

File Name: Supplementary Data 10

Description: Table of GO terms enriched among genes associated with NCC- or PSM-enriched PanK1a peaks.

File Name: Supplementary Data 11

Description: Table of results obtained from running chromVAR on the NCC vs PSM PanK1a differential analysis dataset.

File Name: Supplementary Data 12

Description: Table of results obtained from Nanostring experiment on LDHA/B MO and GTBlue-Control MO transfected neural folds from HH9 embryos.

File Name: Supplementary Data 13

Description: Table of results obtained from running HOMER on the consensus PanKla CUT&RUN peakset.

File Name: Supplementary Data 14

Description: Table of differential accessibility results for GTBlue-Control vs SOX9 MO ATAC-seq samples.
